# Supplementary material for: A critical role of retinoic acid concentration for the induction of a fully human-like atrial action potential phenotype in hiPSC-CM
Source: PubMed Central journal article supplement — Stem Cell Reports. 2023 Nov 2;18(11):2096–107. doi: 10.1016/j.stemcr.2023.10.006 (PMC10679650; doi:10.1016/j.stemcr.2023.10.006), 2023-11-02
Supplement: mmc1.pdf [file mmc1.pdf]

**Stem Cell Reports, Volume 18**

**Supplemental Information**

**A critical role of retinoic acid concentration for the induction of a fully human-like atrial action potential phenotype in hiPSC-CM**

**Carl Schulz, Muhammed Sönmez, Julia Krause, Edzard Schwedhelm, Pan Bangfen, Dzenefa Alihodzic, Arne Hansen, Thomas Eschenhagen, and Torsten Christ**

| ERC | [RA] ( $\mu\text{M}$ ) | BR (bpm)     | MDP (mV)    | TOP (mV)    | APD <sub>20</sub> (ms) | APD <sub>90</sub> (ms) | APD <sub>90-20</sub> /APD <sub>90</sub> |
|-----|------------------------|--------------|-------------|-------------|------------------------|------------------------|-----------------------------------------|
| 001 | 0                      | 54±11.5      | -78.1±0.9   | -77.7±2.6   | 130.2±19.2             | 267±33.6               | 0.54±0.1                                |
|     | 0.01                   | 131.1±14.7 * | -76.6±3.8   | -76.4±4.3   | 86.4±7.9 *             | 206±16 *               | 0.58±0.1                                |
|     | 0.1                    | 187.5±68.7 # | -71.8±4.9   | -71.3±4.2 # | 76.3±11.4              | 161±26 #               | 0.53±0                                  |
|     | 1                      | 147±36 §     | -68.6±0.7 § | -67.7±1.4   | 8.8±3.6 §              | 140±25.5               | 0.92±0 §                                |
| 021 | 0                      | 74.5±12.3    | -74.1±2.1   | -74±4.2     | 108.3±6.9              | 239±28.1               | 0.54±0                                  |
|     | 0.01                   | 77.2±32.5 *  | -67.4±1.1 * | -65.3±4.1 * | 114.7±46 *             | 212±76.1 *             | 0.39±0.2                                |
|     | 0.1                    | 111±18.4 #   | -64.3±2.1 # | -63.9±4.1   | 70.5±39.3 #            | 166±39.3 #             | 0.6±0.1#                                |
|     | 1                      | 125.9±16.7 § | -65.3±4.9   | -65±2       | 17.4±1.6 §             | 125±32.3 §             | 0.85±0 §                                |

**Supplement Table S1: Effects of different concentrations of retinoic acid (RA) on AP parameters.** Mean values±SD for beating rate (BR), maximum diastolic potential (MDP), take-off potential (TOP), action potential duration at 20% (APD<sub>20</sub>) and 90% repolarization (APD<sub>90</sub>) and repolarization fraction (APD<sub>90-20</sub> /APD<sub>90</sub>) measured in intact EHT based on hiPSC-CM differentiated with different retinoic acid (RA) concentrations. \* indicates p<0.05 vs. "0" RA, # indicates p<0.05 vs. 0.01  $\mu\text{M}$  RA and § indicates p<0.05 vs. 0.1  $\mu\text{M}$  RA (ANOVA, same n numbers as in Figure 2).

| ERC | [RA] ( $\mu\text{M}$ ) | $\Delta\text{APD}_{20}$ | $\Delta\text{APD}_{90}$ | $\Delta V_{\text{plateau}}$ |
|-----|------------------------|-------------------------|-------------------------|-----------------------------|
| 001 | 0                      | 1.5±2                   | 4.2±5.9                 | 3.2±2.1                     |
|     | 0.01                   | 18±14.1 *               | 27.3±12.4 *             | 2.3±5.7                     |
|     | 0.1                    | 8.9±12.6                | 18.1±20.6               | 1.1±8.9 #                   |
|     | 1                      | 20.26±5.6               | -25.8±25.9 §            | 12±1.7 §                    |
| 021 | 0                      | 1.8±19.9                | 9±15                    | -0.3±.6                     |
|     | 0.01                   | 16.3±8.2 *              | 24±12.4 *               | 3.1±14.3                    |
|     | 0.1                    | 6.3±6.2                 | 12.4±11.8               | 7.5±2.5                     |
|     | 1                      | 18±7.8                  | -17.3±10 §              | 13.6±5.1 §                  |

**Supplement Table S2: Effects of different concentrations of retinoic acid (RA) on 4-aminopyridine effects.** Mean values±SD for the effects of 50  $\mu\text{M}$  4-aminopyridine (4-AP, expressed as  $\Delta$ -values) on action potential duration at 20% repolarization (APD<sub>20</sub>), plateau voltage ( $V_{\text{plateau}}$ ) and action potential duration at 90% repolarization (APD<sub>90</sub>) measured in intact EHT based on hiPSC-CM differentiated with different retinoic acid (RA) concentrations. \* indicates p<0.05 vs. "0" RA, # indicates p<0.05 vs. 0.01  $\mu\text{M}$  RA and § indicates p<0.05 vs. 0.1  $\mu\text{M}$  RA (ANOVA, same n numbers as in Figure S3).

| ERC | [RA] ( $\mu\text{M}$ ) | $\Delta\text{APD}_{90}$ | $\Delta\text{TOP}$ | $\Delta\text{BR}$  |
|-----|------------------------|-------------------------|--------------------|--------------------|
| 001 | 0                      | 3.1 $\pm$ 4.2           | 0.1 $\pm$ 2        | 3.3 $\pm$ 4.3      |
|     | 0.01                   | 4.3 $\pm$ 8.4 *         | -0.03 $\pm$ 1.4    | -8.8 $\pm$ 16 *    |
|     | 0.1                    | 0.1 $\pm$ 9.3           | -3.6 $\pm$ 5.4     | -15.9 $\pm$ 25.3   |
|     | 1                      | -57.1 $\pm$ 33 §        | -7.2 $\pm$ 3.4     | -45.6 $\pm$ 28.1   |
| 021 | 0                      | 4.1 $\pm$ 30.7          | 0.1 $\pm$ 1.1      | -3.6 $\pm$ 12.4    |
|     | 0.01                   | -38.2 $\pm$ 16.9 *      | -1 $\pm$ 2.1       | -24.4 $\pm$ 10.7 * |
|     | 0.1                    | -32 $\pm$ 12.2          | -1.2 $\pm$ 3.3     | -40.6 $\pm$ 24     |
|     | 1                      | -40 $\pm$ 7.7 §         | -7.8 $\pm$ 2.3 §   | -61.6 $\pm$ 9.8 §  |

**Supplement Table S3: Effects of different concentrations of retinoic acid (RA) on carbachol effects.**

Mean values $\pm$ SD for the effects of 10  $\mu\text{M}$  carbachol (CCh, expressed as  $\Delta$ -values) on action potential duration at 20% repolarization ( $\text{APD}_{20}$ ), take-off potential (TOP) and beating rate (BR) measured in intact EHT based on hiPSC-CM differentiated with different retinoic acid (RA) concentrations. \* indicates  $p < 0.05$  vs. "0" RA, # indicates  $p < 0.05$  vs. 0.01  $\mu\text{M}$  RA and § indicates  $p < 0.05$  vs. 0.1  $\mu\text{M}$  RA (ANOVA, same n numbers as in Figure S4).

|               | Filtropur S® (n=9) | Millex-GP® (n=9) | Whatman® REZIST (n=9) |
|---------------|--------------------|------------------|-----------------------|
| Recovery in % | 29.8±2.4           | 28.6±7.6         | 0.1±0.01              |

**Supplement Table S4: Loss of RA by sterile filtration**

Mean values±SD for recovery rate of RA concentration in % of unfiltered controls (n=6, data not shown) for three different filters.

| Cell type                            | Adult atrial tissue        | hiPSC-CM          | hiPSC-CM   | hESC-CM      | hiPSC-CM    | hiPSC-CM        | hESC-CM      | hESC-CM     | hiPSC-CM     |
|--------------------------------------|----------------------------|-------------------|------------|--------------|-------------|-----------------|--------------|-------------|--------------|
| Culture format                       | -                          | <b>3D</b>         | 3D         | 2D           | 2D          | 3D              | 2D           | 2D          | 3D           |
| RA concentration ( $\mu$ M)          | -                          | <b>1</b>          | 1 (?)      | 1            | 2           | 0.25-0.5        | 1            | 1           | 1            |
| Recording technique                  | Sharp ME                   | <b>Sharp ME</b>   | Sharp ME   | Patch clamp  | Patch clamp | Patch clamp     | Patch clamp  | Patch clamp | Voltage dye  |
| Temperature                          | 37 °C                      | <b>37 °C</b>      | 37 °C      | 36 °C        | RT          | 31 °C           | RT           | RT          | RT           |
| MDP/RMP (mV)                         | -76                        | <b>-68</b>        | -69        | -72          | -55         | -63             | -56          | -56         | n. d.        |
| APA (mV)                             | 105                        | <b>82</b>         | 80         | 80           | 85          | n. d.           | 80           | 82          | n. d.        |
| APD <sub>20</sub> (ms)               | 8                          | <b>10</b>         | 31         | 21           | 13*         | 115*            | 37*          | n. d.       | n. d.        |
| APD <sub>90</sub> (ms)               | 314                        | <b>140</b>        | 220        | 145          | 189         | 205             | 247          | 169         | n. d.        |
| APD <sub>20</sub> /APD <sub>90</sub> | 0.02                       | <b>0.07</b>       | 0.14       | 0.14         | 0.07        | 0.56*           | 0.14         | n. d.       | 0.12*        |
| dV/dt <sub>max</sub> (V/s)           | 219 <sup>#</sup>           | <b>104</b>        | 95         | 26           | 68          | 7               | 63           | 13          | n. d.        |
| V <sub>Plateau</sub>                 | -16 <sup>#</sup>           | <b>-16</b>        | n. d.      | -10          | n.d.        | n. d.           | n. d.        | n.d.        | n. d.        |
| <b>4-AP effect</b>                   |                            |                   |            |              |             |                 |              |             |              |
| APD <sub>20</sub> (% of baseline)    | 194                        | <b>300</b>        | 106        | 205          | n. d.       | n. d.           | n. d.        | n. d.       | n. d.        |
| APD <sub>90</sub> (% of baseline)    | 88                         | <b>81</b>         | 100        | 120          | n. d.       | n. d.           | n. d.        | n. d.       | n. d.        |
| <b>CCh effect</b>                    |                            |                   |            |              |             |                 |              |             |              |
| APD <sub>90</sub> (% of baseline)    | 55                         | <b>60</b>         | 82         | 97           | n. d.       | 69              | n. d.        | n. d.       | n. d.        |
| MDP/RMP (% of baseline)              | 102                        | <b>110</b>        | 107        | 107          | n. d.       | n. d.           | n. d.        | n. d.       | n. d.        |
| Author/Year                          | Lemme 2018<br>Wettwer 2004 | <b>This study</b> | Lemme 2018 | Devalla 2015 | Lee 2017    | Goldfracht 2020 | Laksman 2017 | Zhang 2011  | Cyganek 2018 |

### Supplement Table S5: Action potential parameters in different types of atrial cardiomyocytes.

Overview about action potential (AP) parameters of different cell types and different studies. The different cell types included adult atrial tissue, cardiomyocytes differentiated from human induced pluripotent stem cells (hiPSC-CM) and cardiomyocytes differentiated from human embryonic stem cells (hESC-CM). The effects of carbachol (CCh) and 4-aminopyridine (4-AP) are given as percentage of baseline values. \* indicates an estimated parameter from AP shape.

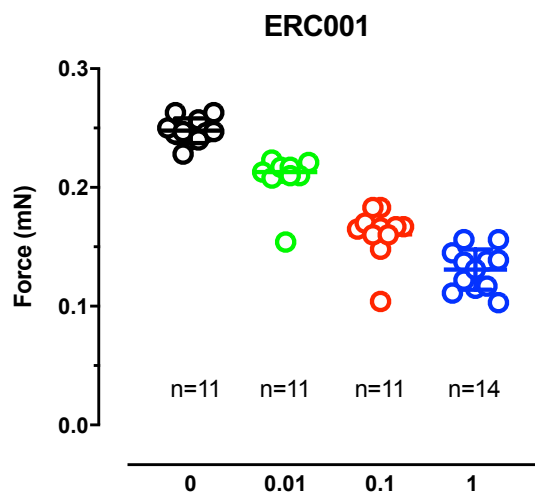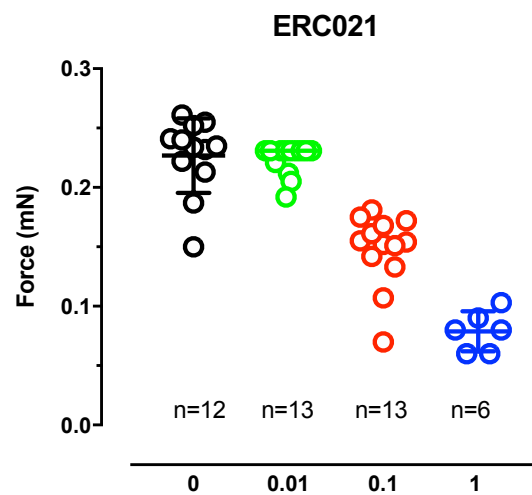



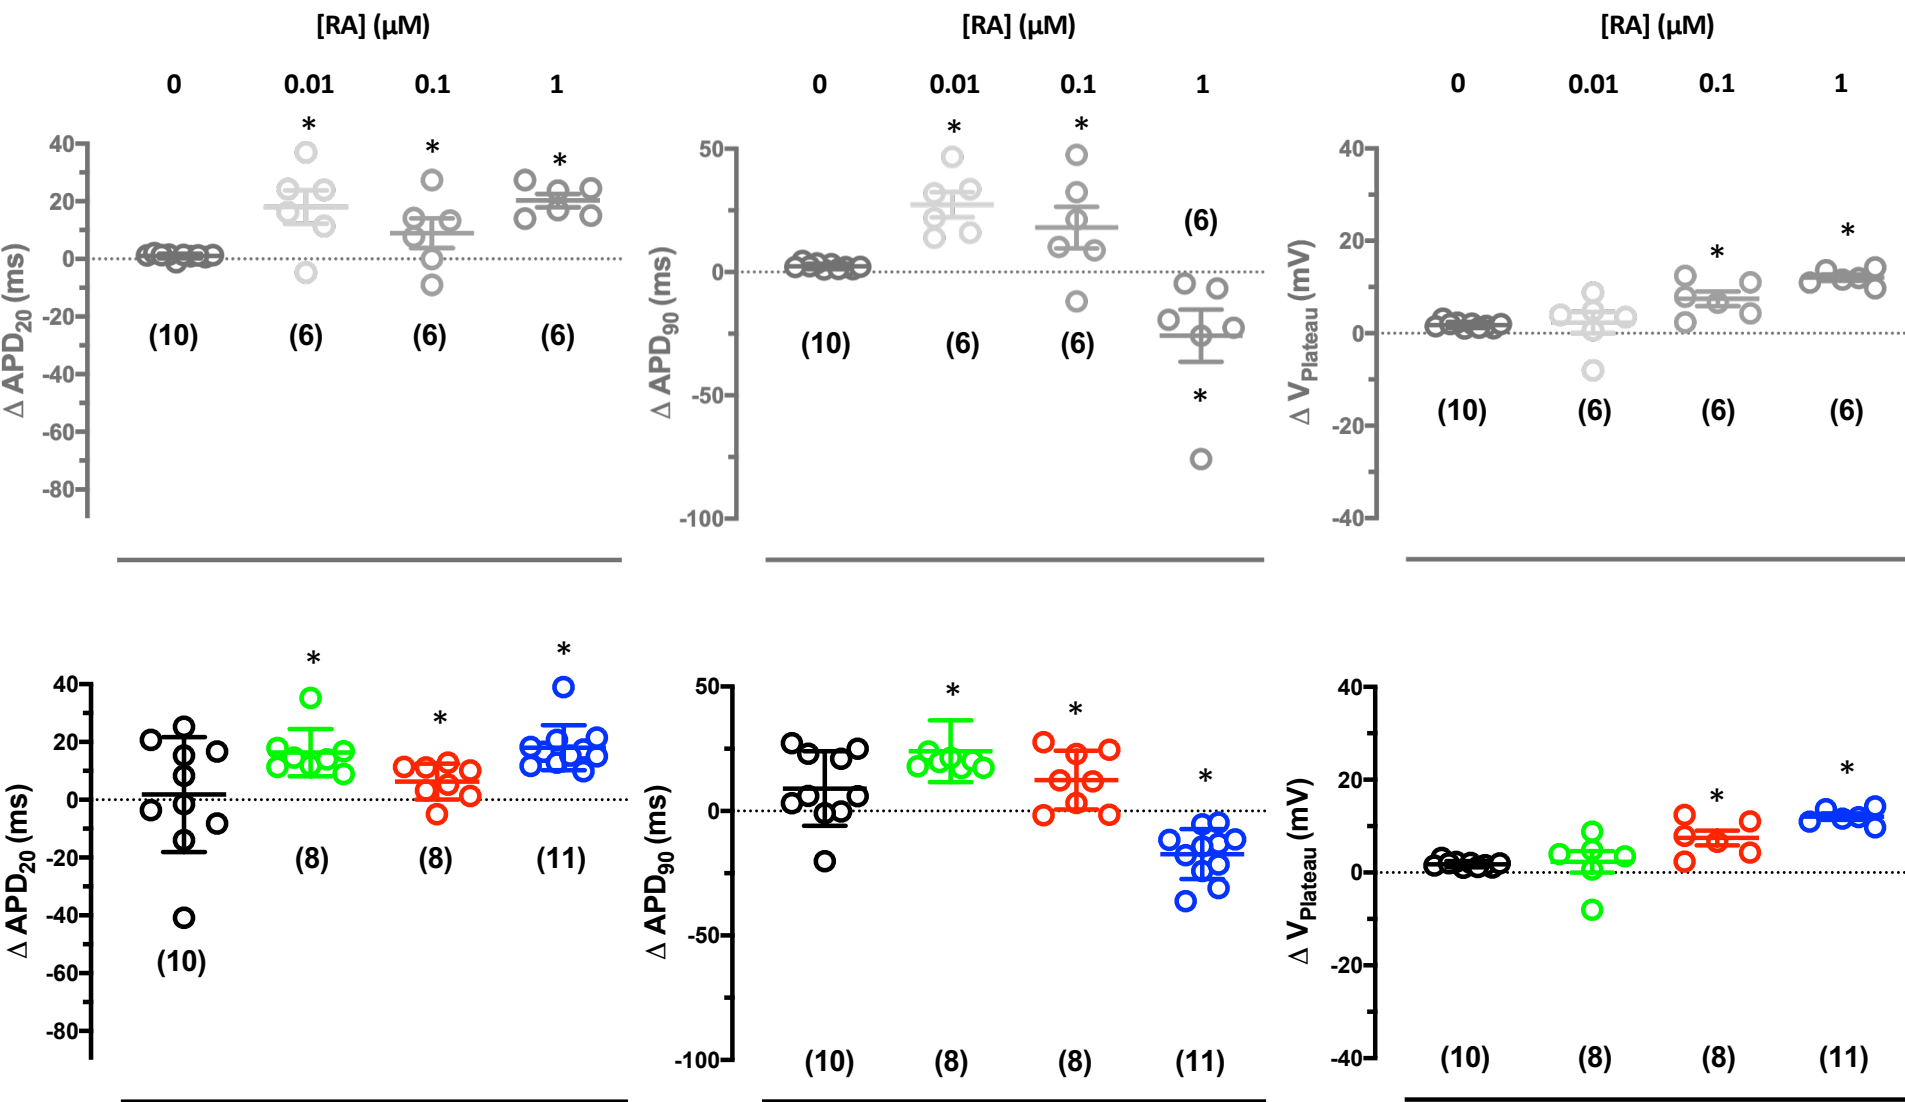



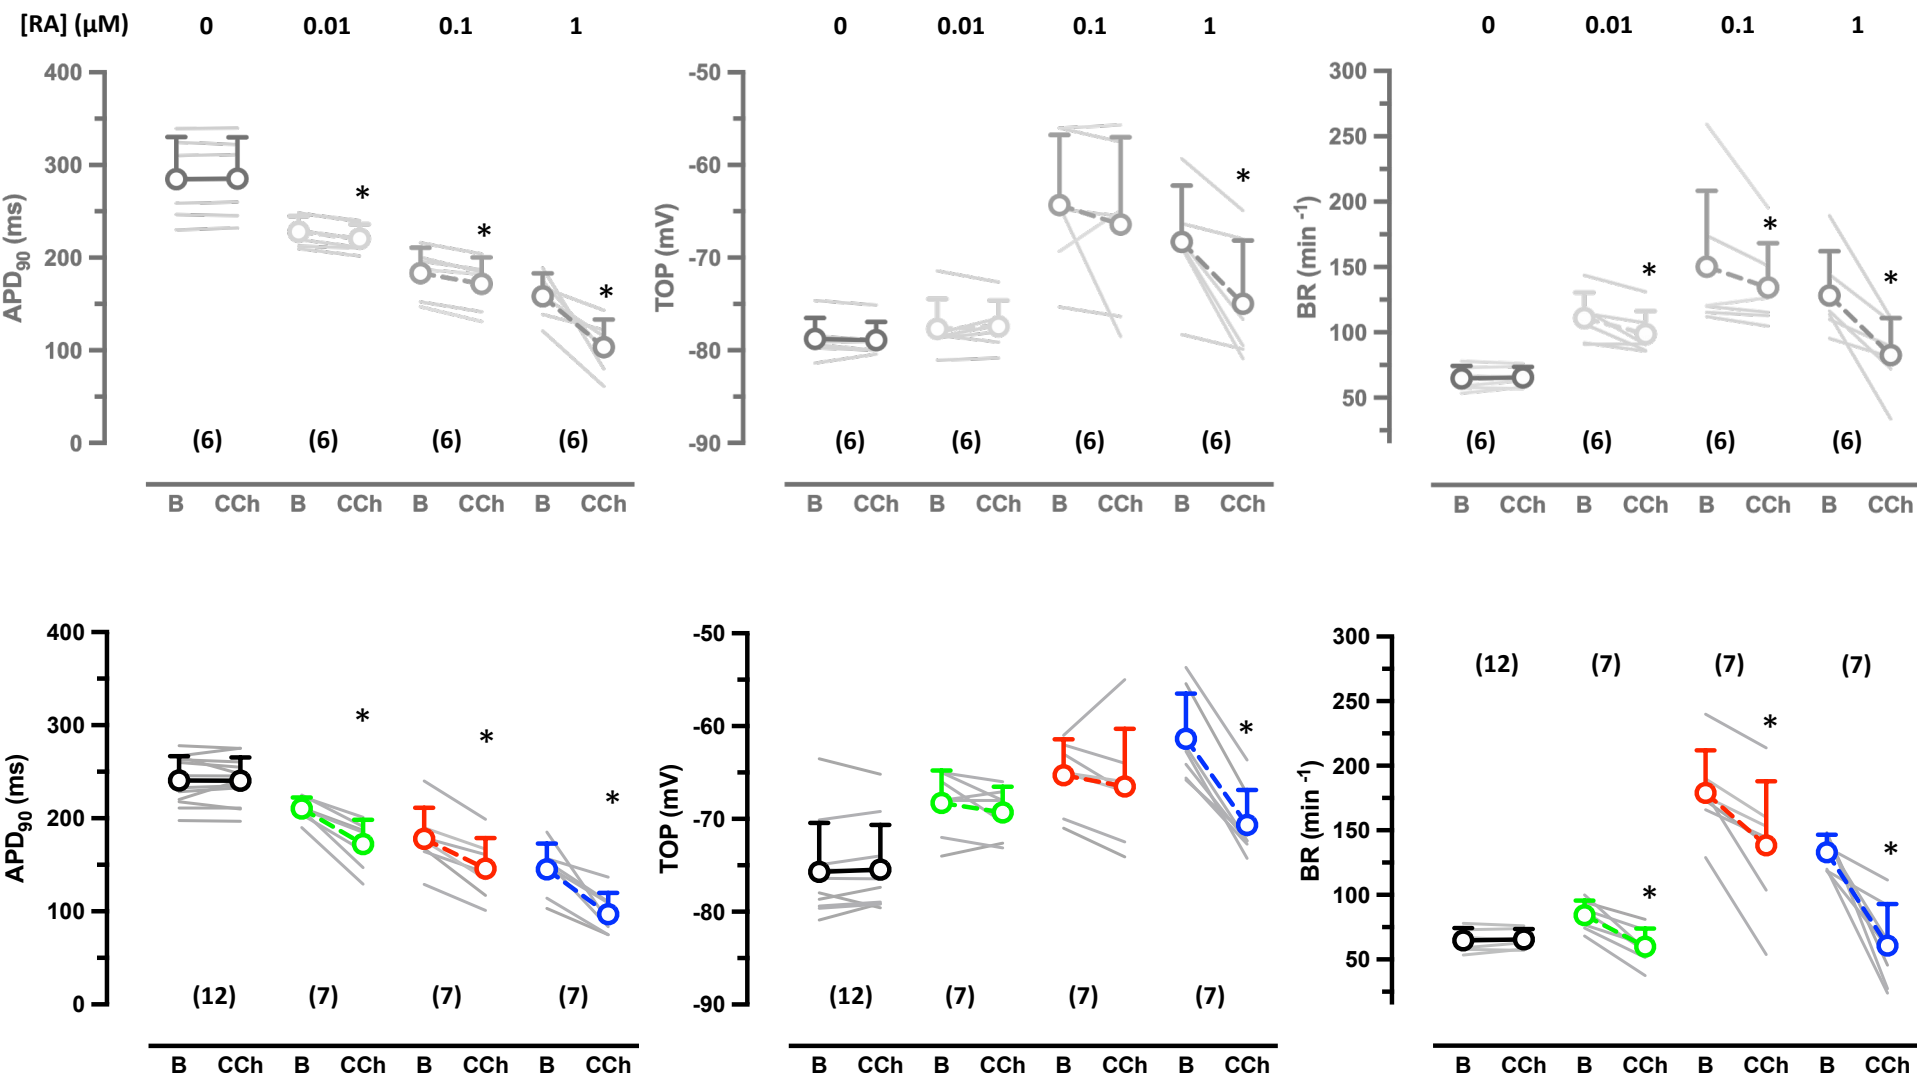

Supplement Figure S4

## Legends to supplement figures

### Figure S1: Concentration-dependency of RA on force in EHT

Mean values $\pm$ SD force in EHT from ERC001 and ERC021.

### Figure S2: Concentration-dependency of RA on AP in EHT in a second cell line (ERC021)

**Summary of results:** Mean values $\pm$ SD for beating rate (**BR**), take-off potential (**TOP**), action potential duration (at 20 and 90% repolarization, **APD<sub>20</sub>** and **APD<sub>90</sub>**) and repolarization fraction (**APD<sub>90</sub>-APD<sub>50</sub>/APD<sub>90</sub>**) in EHT from ERC021. \* indicates  $p < 0.05$  vs. 0 RA, one way ANOVA of log transformed data. Number of EHTs resulting from one differentiation run is given in brackets. For better comparison, data for ERC001 (given already in the main manuscript as **Figure 2**) are plotted again in grey.

### Figure S3: Concentration-dependency of RA on the AP-response to **I<sub>Kur</sub>** block

**Top:** Data for ERC001 (given already in the main manuscript as **Figure 3**) are plotted in grey.  
**Bottom:** Data for ERC021. Summary of results for the effects of 4-AP on APD<sub>20</sub> (**left**), on plateau voltage ( $V_{\text{plateau}}$ , **middle**) and on APD<sub>90</sub> in ERC021 (**right**). Open circles indicate mean values $\pm$ SD. Numbers in brackets indicate number of EHTs resulting from one differentiation run. \* indicates  $p < 0.05$  vs. 0 RA, one-way ANOVA of log transformed data.

### Figure S4: Concentration-dependency of RA on carbachol effects on APD<sub>90</sub> in EHT

**Top:** Data for ERC001 (given already in the main manuscript as **Figure 5**) are plotted in grey.  
**Bottom:** Data for ERC021. Summary of results for the effects of CCh on beating rate (**BR**, **left**), take-off potential (**TOP**, **middle**) and APD<sub>90</sub> (**right**). Gray lines indicate individual EHT. Numbers in brackets indicate number of EHTs resulting from one differentiation run. Open circles indicate mean values $\pm$ SD. \* indicates  $p < 0.05$  vs. basal (paired t-test). Number of EHTs is given in brackets.
